# Supplementary material for: Determining clinically important differences in health-related quality of life in older patients with cancer undergoing chemotherapy or surgery
Source: Springer Nature journal article supplement (doi:10.1007/s11136-018-2062-6), 2018-12-03
Supplement: MOESM1 [file 16312582]

ELECTRONIC SUPPLEMENTARY MATERIAL

**Table 1. Logistic regression models to assess the association between HRQOL deterioration and baseline socio-demographic, clinical and GA patient characteristics. Sensitivity analysis where MCID for deterioration was set at 11 for the surgery group and 7 for the chemotherapy group using ECOG PS as clinical anchor.**

|  | Surgery  174/741 (23.48%) | | Chemotherapy  252/683 (36.90%) | |
| --- | --- | --- | --- | --- |
|  | **OR¶ (CI)*** | **p-value** | **OR (CI)** | **p-value** |
| Age | 1.02 (0.99;1.05) | 0.310 | 0.99 (0.96;1.02) | 0.723 |
| Gender  Male  Female | 1.00  0.99 (0.70;1.40) | 0.972 | 1.00  0.87 (0.64;1.20) | 0.421 |
| Living situation  Home Alone  Home with Family Member  Home with Partner  Institution  Service Flat  Other | 1.00  1.21 (0.59;2.48)  1.16 (0.79;1.68)  1.23 (0.53;2.90)  1.09 (0.47;2.53)  0.39 (0.05;3.18) | 0.590  0.450  0.628  0.837  0.382 | 1.00  1.73 (0.90;3.33)  0.99 (0.70;1.40)  0.24 (0.03;2.05)  1.73 (0.24;12.55)  0.34 (0.04;3.02) | 0.098  0.945  0.196  0.586  0.338 |
| Professional home care  No  Yes | 1.00  1.29 (0.91;1.83) | 0.142 | 1.00  0.97 (0.72;1.33) | 0.884 |
| Diagnosis  Carcinoma  Hematologic | 1.00  0.91 (0.48;1.73) | 0.785 | 1.00  0.98 (0.71;1.34) | 0.900 |
| Tumour Carcinoma  Breast  Central Nervous System  Unknown Primary Cancer  Digestive system  Genitourinary sites  Gynaecologic sites  Head and neck  Musculoskeletal sites  Skin  Thorax | 1.00  7.74 (0.76;78.21)  -  0.68 (0.39;1.16)  0.68 (0.45;1.59)  0.79 (0.38;1.65)  0.92 (0.29;2.84)  -  1.58 (0.58;4.31)  1.08 (0.42;2.81) | 0.083  -  0.156  0.614  0.539  0.888  -  0.363  0.682 | 1.00  -  1.92 (0.51;7.26)  1.24 (0.72;2.17)  0.83 (0.43;1.62)  1.37 (0.67;2.77)  1.44 (0.44;4.61)  1.44 (0.23;3.04)  0.85 (0.24;3.05)  1.05 (0.55;1.98) | -  0.337  0.433  0.589  0.380  0.539  0.650  0.807  0.880 |
| Staging  I  II  III  IV | 1.00  1.16 (0.73;1.85)  1.21 (0.73;2.01)  1.34 (0.72;2.51) | 0.526  0.454  0.358 | 1.00  1.74 (0.39;7.68)  2.96 (0.77;11.30)  1.99 (0.54;7.25) | 0.461  0.112  0.295 |
| Time of Inclusion  Newly diagnosed  Progressed/Relapsed | 1.00  1.16 (0.89;1.51) | 0.267 | 1.00  0.97 (0.71;1.34) | 0.900 |
| ECOG PS  0-1 (good)  2-4 (bad) | 1.00  0.84 (0.59;1.19) | 0.343 | 1.00  0.77 (0.56;1.07) | 0.129 |
| MMSE  ≥24 (good)  <24 (bad) | 1.00  0.85 (0.53;1.35) | 0.490 | 1.00  1.19 (0.74;1.90) | 0.471 |
| iADLa  8 (high function)  0-7 (low function) | 1.00  1.13 (0.75;1.70) | 0.565 | 1.00  0.88 (0.62;1.27) | 0.518 |
| ADL  <7 (high function)  ≥7 (low function) | 1.00  1.13 (0.80;1.59) | 0.462 | 1.00  1.15 (0.84;1.57) | 0.379 |
| MNA-SF  ≥12 (good nutrition)  <12 (poor nutrition) | 1.00  0.67 (0.46;0.98) | *0.040* | 1.00  1.08 (0.72;1.62) | 0.705 |
| GDS15  ≤4 (no risk for depression)  >4 (risk for depression) | 1.00  0.91 (0.62;1.35) | 0.666 | 1.00  1.03 (0.75;1.43) | 0.829 |
| VAS Pain  0 (no pain)  >0 (pain) | 1.00  0.63 (0.44;0.89) | *0.010* | 1.00  0.92 (0.77;1.26) | 0.625 |
| VAS Fatigue  0 (no fatigue)  >0 (fatigue) | 1.00  0.93 (0.64;1.35) | 0.721 | 1.00  0.62 (0.41;0.92) | *0.018* |

**¶**OR=Odds Ratio;

*CI=Confidence Interval;

*#* italic values present statistical significant association;

a score 5 for males and score 8 for females

ECOG-PS: Eastern Cooperative Oncology Group – Performance Status; MMSE: Mini Mental State Examination; IADL: Instrumental Activities of Daily Living; ADL: Activities of Daily Living; MNA-SF: Mini Nutritional Assessment- Screening Form; GDS: Geriatric Depression Scale; VAS: Visual Analogue Score.
